# Supplementary material for: Deciphering cell lineage specification of human lung adenocarcinoma with single-cell RNA sequencing
Source: PubMed Central journal article supplement (PMC8586023; doi:10.1038/s41467-021-26770-2), 2021-11-11
Supplement: 41467_2021_26770_MOESM5_ESM.pdf [file 41467_2021_26770_MOESM5_ESM.pdf]

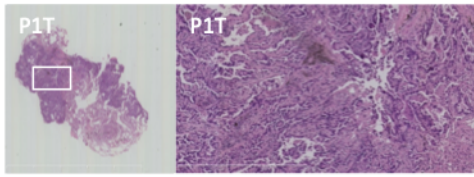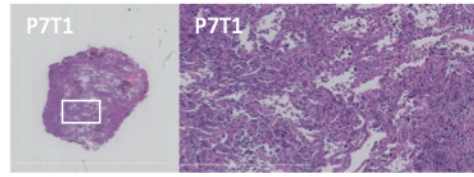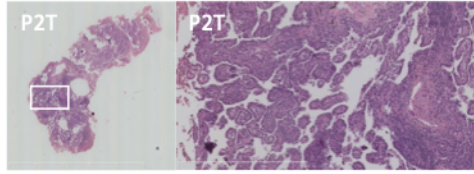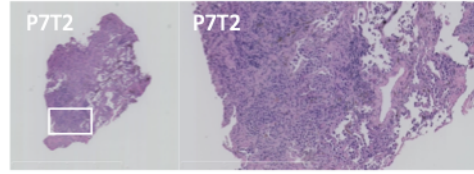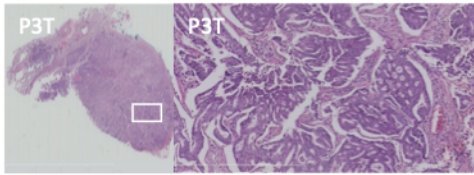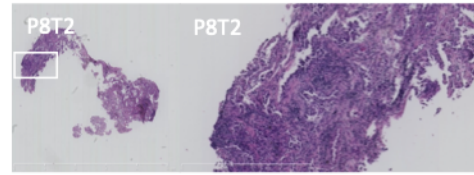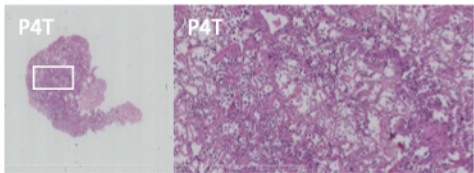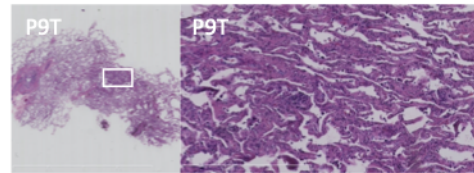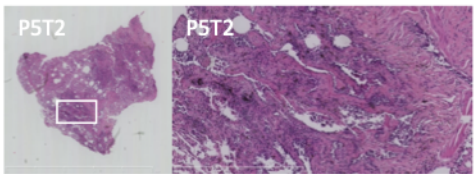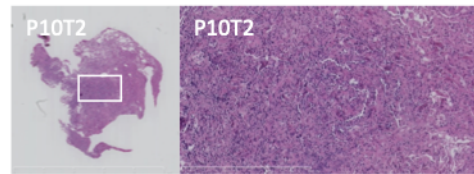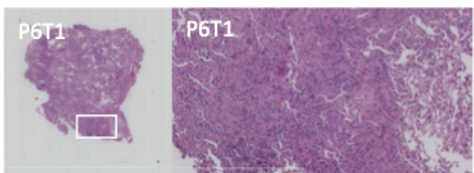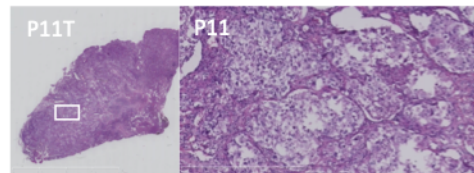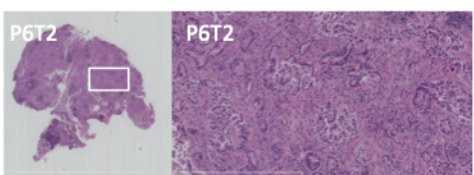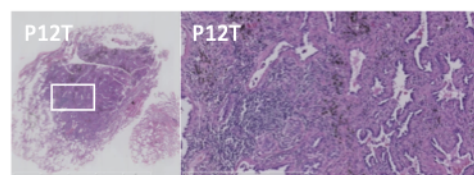

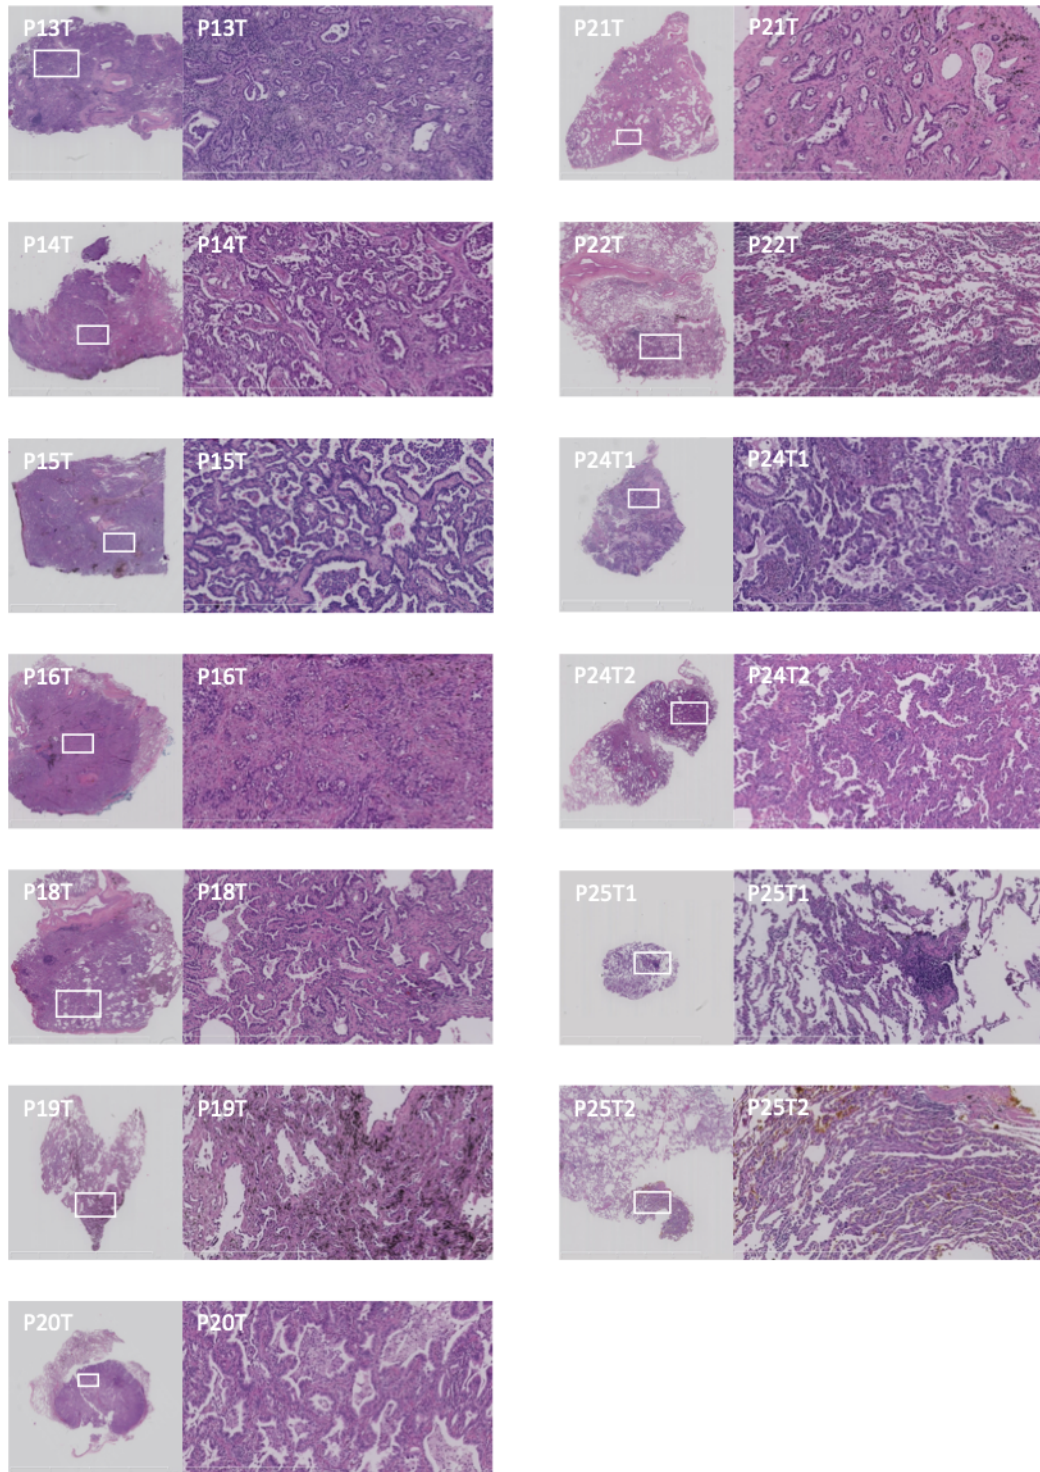

Supplementary Data File 3. H&E staining of paraffin-embedded sections cut from the tumors. Each staining was repeated three times independently on consecutive sections. The labels indicate tumor identifiers. Scale bars: 200 $\mu$ m.
