# Supplementary material for: Deciphering cell lineage specification of human lung adenocarcinoma with single-cell RNA sequencing
Source: PubMed Central journal article supplement (PMC8586023; doi:10.1038/s41467-021-26770-2), 2021-11-11
Supplement: 41467_2021_26770_MOESM11_ESM.pdf [file 41467_2021_26770_MOESM11_ESM.pdf]

### P7T2 MIA

Hallmark pathways NES from GSEA

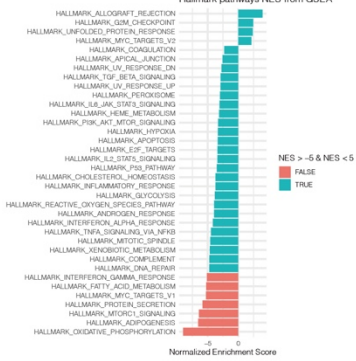

### P8N

Hallmark pathways NES from GSEA

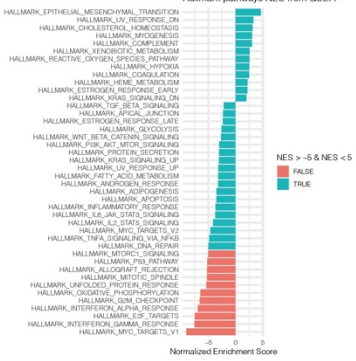

### P8T1 IA

Hallmark pathways NES from GSEA

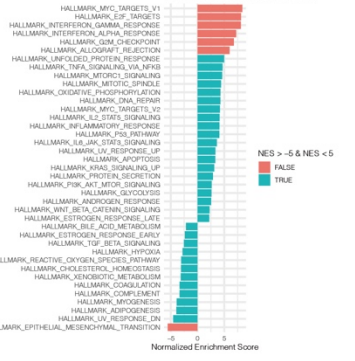

### P8T2 AIS

Hallmark pathways NES from GSEA

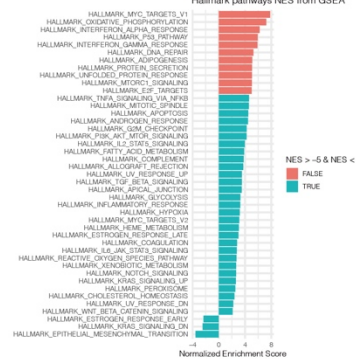

### P10T1 AIS

Hallmark pathways NES from GSEA

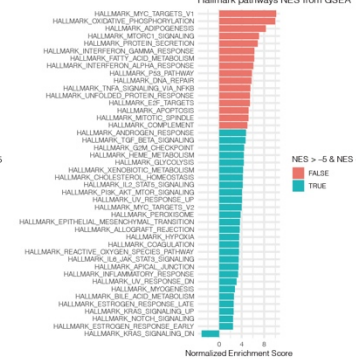

### P10T2 AAH

Hallmark pathways NES from GSEA

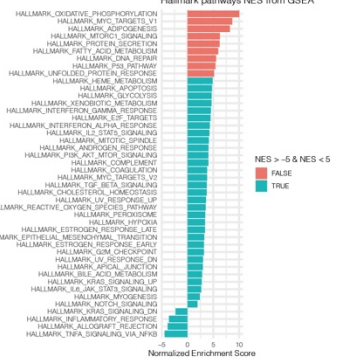

### P11N

Hallmark pathways NES from GSEA

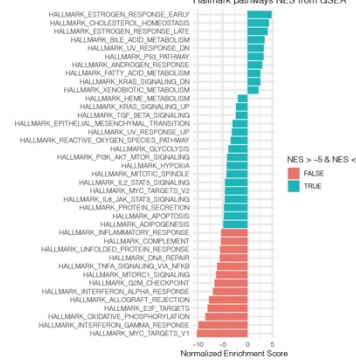

### P11T IA

Hallmark pathways NES from GSEA

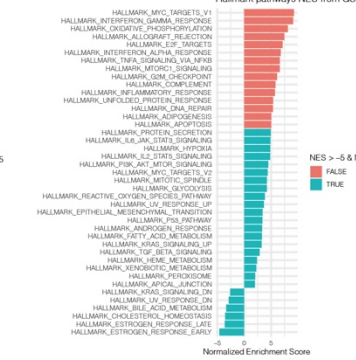

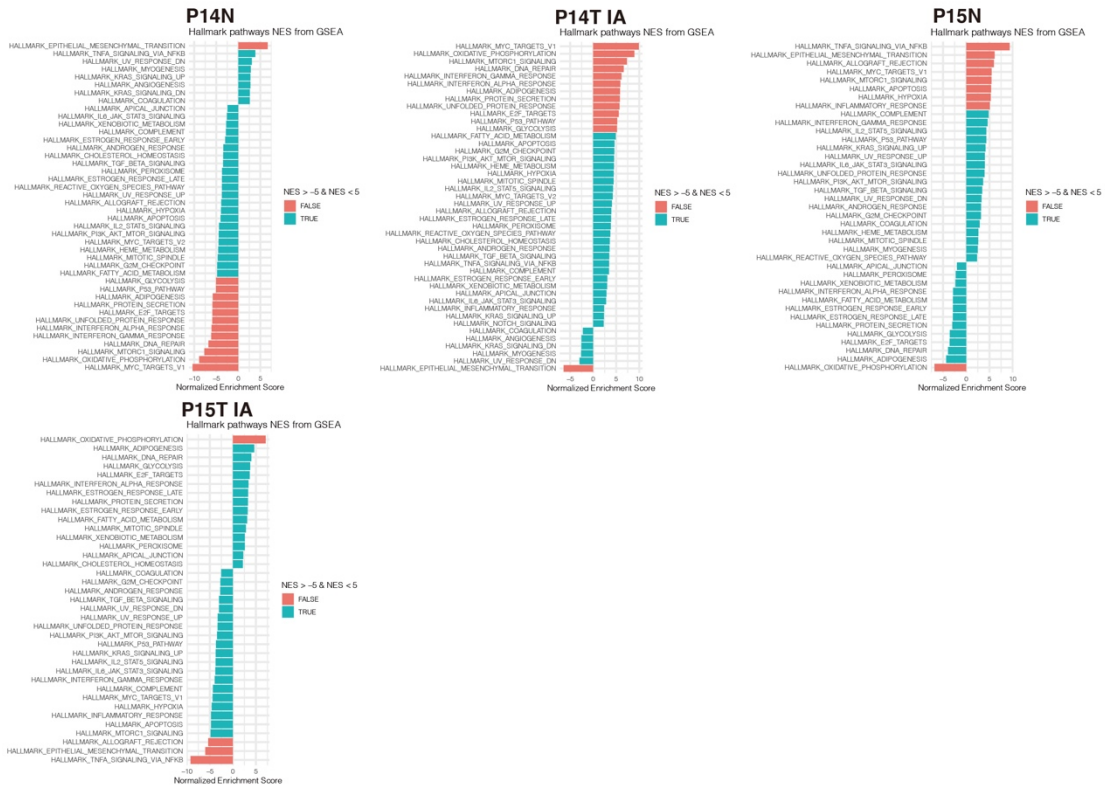

Supplementary Data File 9. Top enriched pathway of endothelial cells isolated from normal or tumor tissues of individual patients as determined by GSEA. The labels indicate tumor identifiers.
